# Supplementary material
Source: MDPI journal article supplement (https://www.mdpi.com/2079-3197/8/1/12)
Supplement: s1 [file s1]

Archive with 1 entries (1 files):
- computation-710410-s1.pdf
