# Supplementary material
Source: MDPI journal article supplement (https://www.mdpi.com/2079-3197/8/1/12)
Supplement: s1 [file s1 › computation-710410-s1.pdf]

**Supporting Information:**

**Improved Sampling in Ab Initio Free Energy  
Calculations of Biomolecules at Solid-Liquid  
Interfaces: Tight-Binding Assessment of Charged  
Amino Acids on TiO<sub>2</sub> Anatase (101)**

Lorenzo Agosta<sup>\*,†</sup> and Erik G. Brandt and Alexander P. Lyubartsev<sup>‡</sup>

*<sup>†</sup>Department of Chemistry, Uppsala University, Sweden*

*<sup>‡</sup>Department of Materials and Environmental Chemistry, Stockholm University, S-10691  
Stockholm, Sweden*

E-mail: [lorenzo.agosta@kemi.uu.se](mailto:lorenzo.agosta@kemi.uu.se)

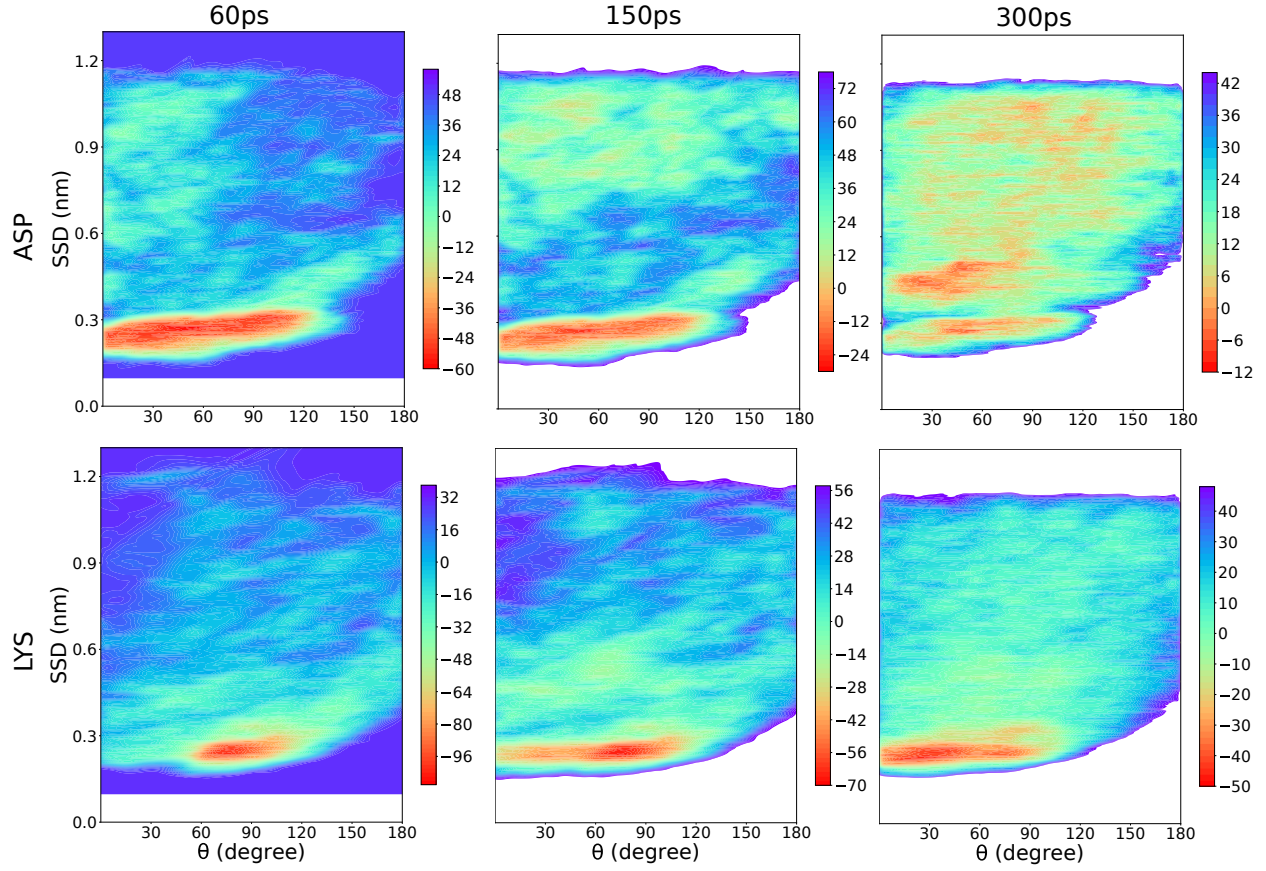

Figure S1. 2D histograms of the accumulated bias potential for the two CVs, SSD and  $\theta$ , implemented in the Metadynamics simulation at different intervals of time. A single global minima is present for Lys and Asp as function of  $\theta$ , thus the free energy profile is mostly driven by the SSD variable. Asp is more free to span the rotational space once it is adsorbed while Lys presents a preferential orientation around  $\theta = 30^\circ$  in the converged profile.

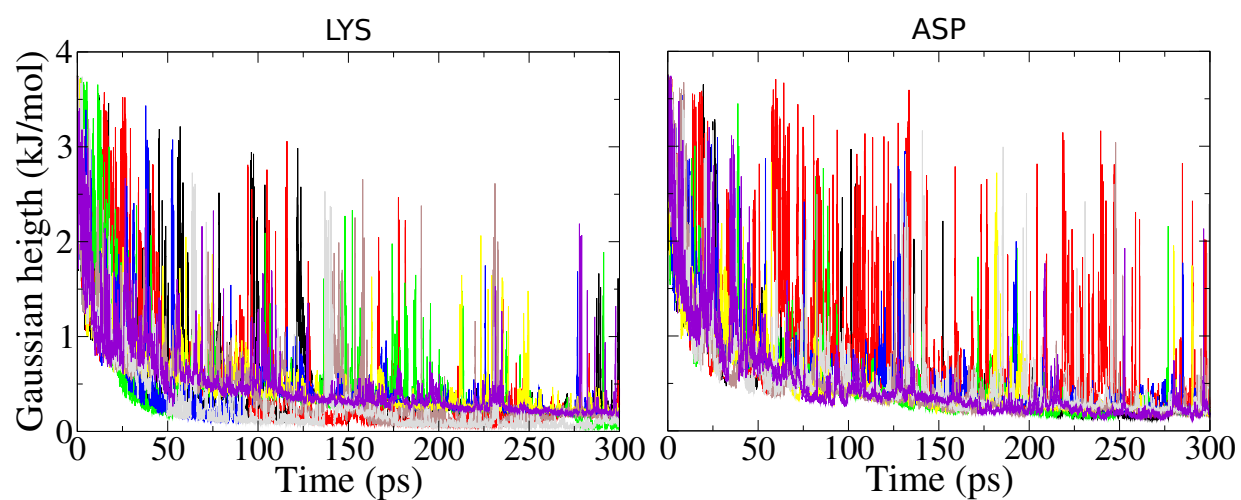

Figure S2. Variation of the Gaussians height driven by the bias factor during the Metadynamics simulation. The values for the 8 walkers are plotted for both Lys and Asp systems. Within 50 ps the starting value of 3.5 kJ/mol decays by 80% and it oscillates around a final values of 0.05 kJ/mol. The spikes represent the sampling of unexplored regions of the phase space.
